# Supplementary material
Source: Springer Nature journal article supplement (https://www.springermedizin.de/resource/supplementary/13054_2014_2580_MOESM3_ESM.pdf/9714320)

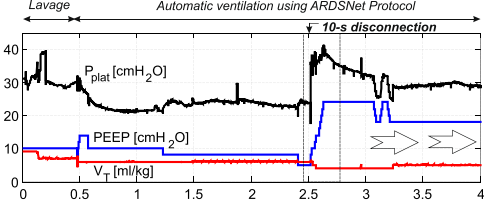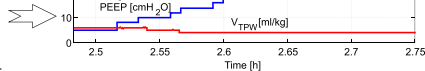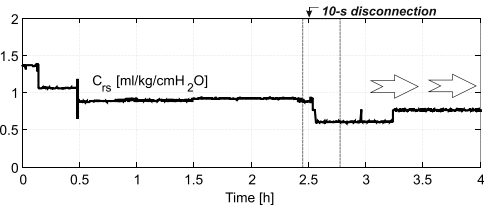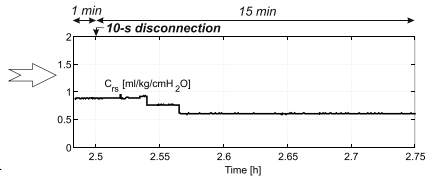

Supplement: MOESM3 [file 9714320]
